# Supplementary material
Source: PubMed Central journal article supplement (PMC1748237)

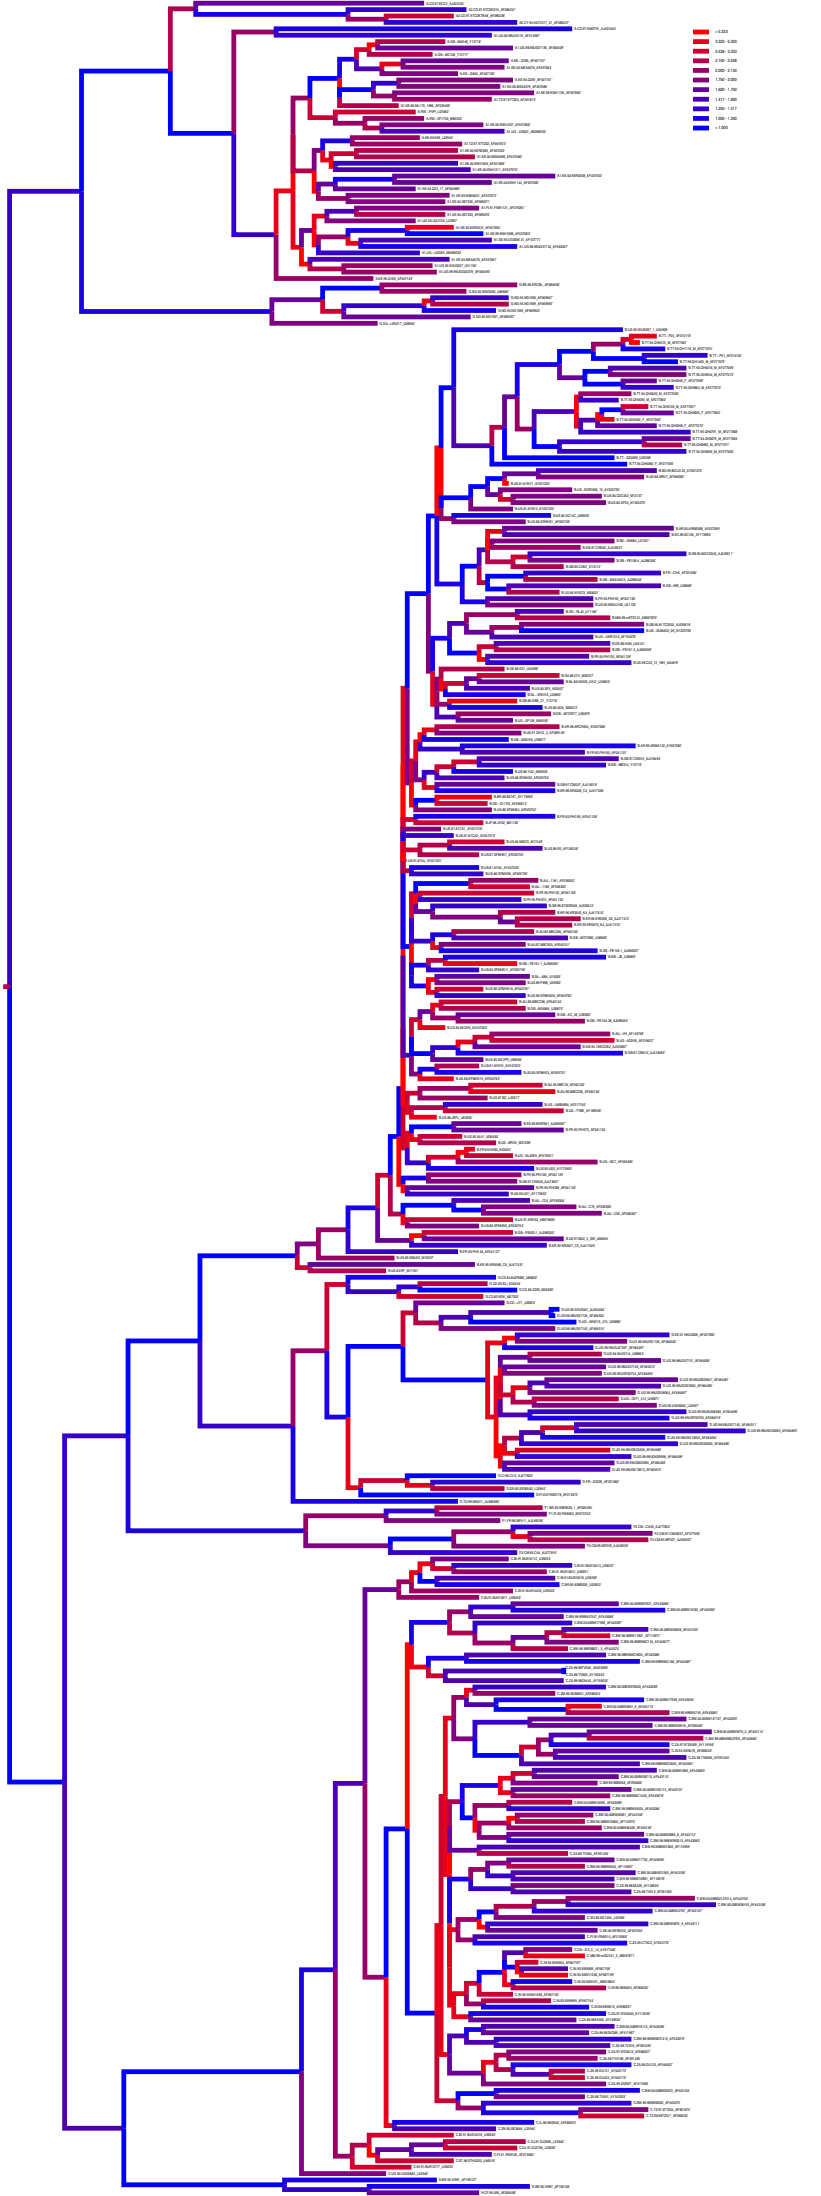

Supplement: pnas_0609484103_1.pdf [file pnas_0609484103_1.pdf]

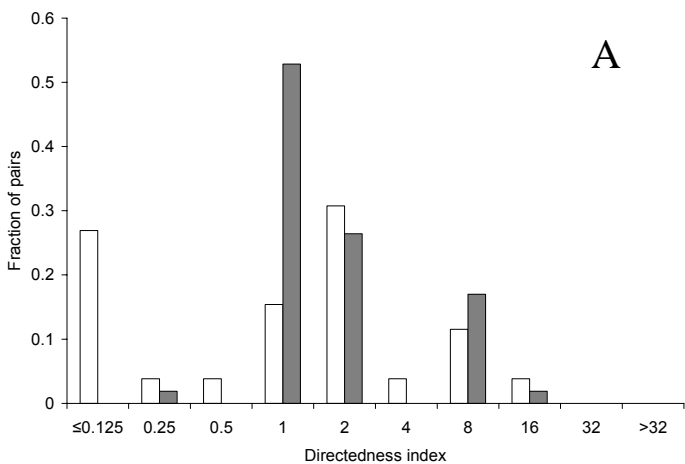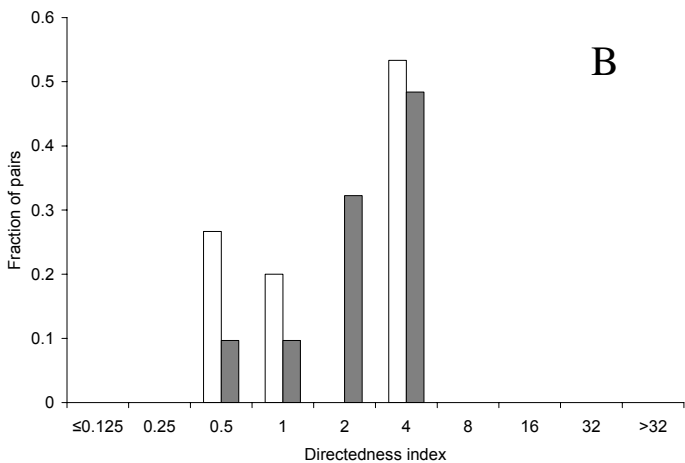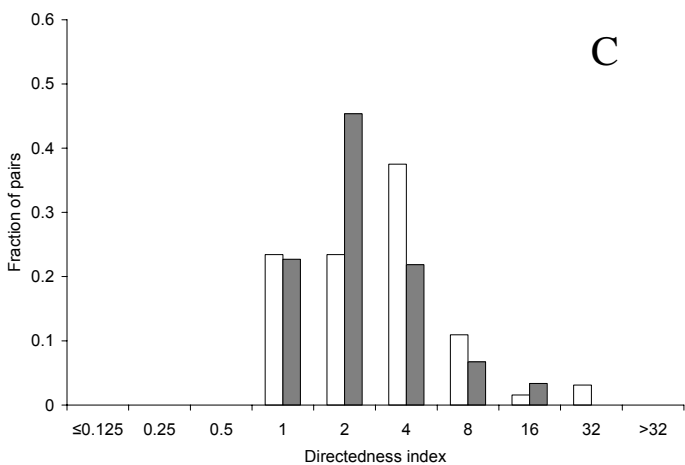

Supplement: pnas_0609484103_10.pdf [file pnas_0609484103_10.pdf]

*pol*

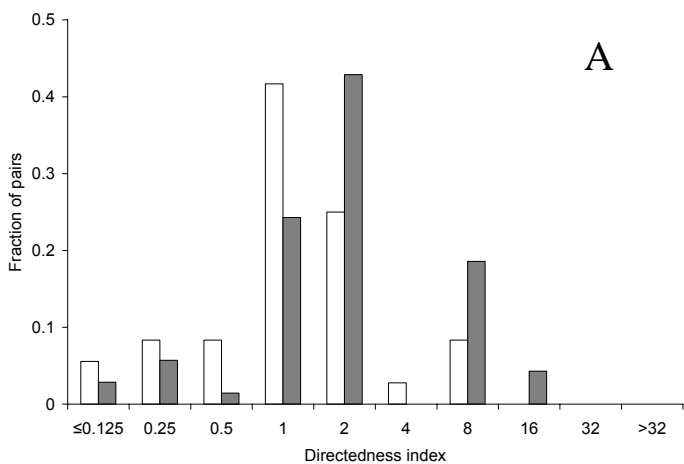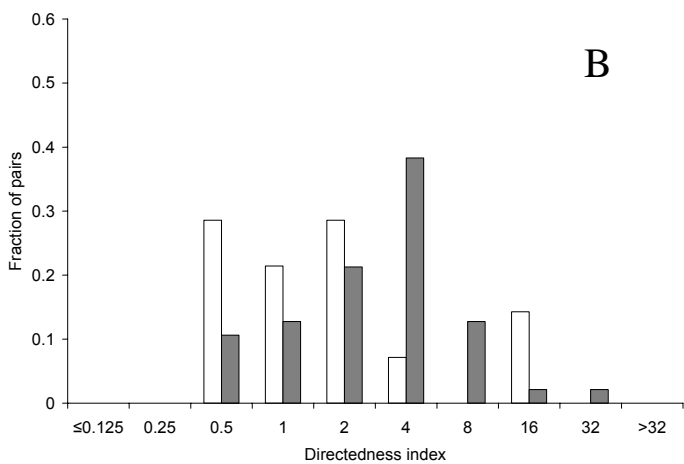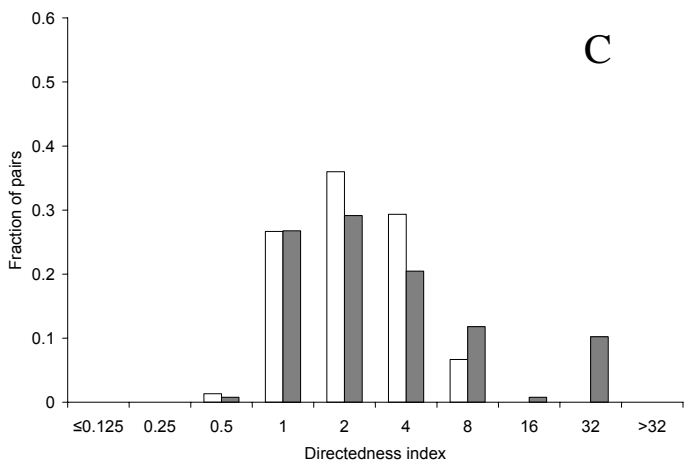

Supplement: pnas_0609484103_11.pdf [file pnas_0609484103_11.pdf]

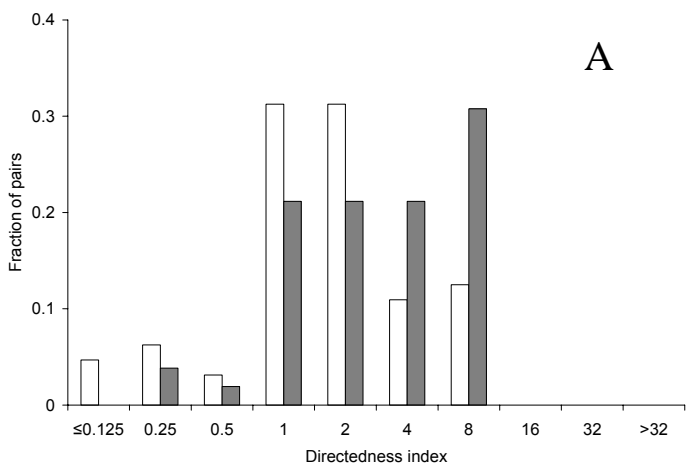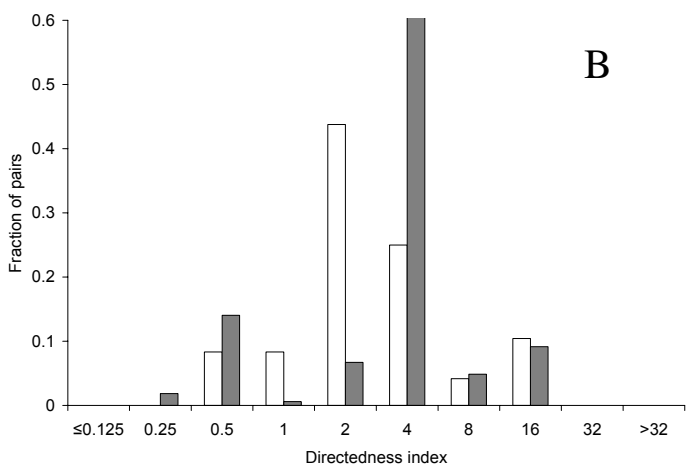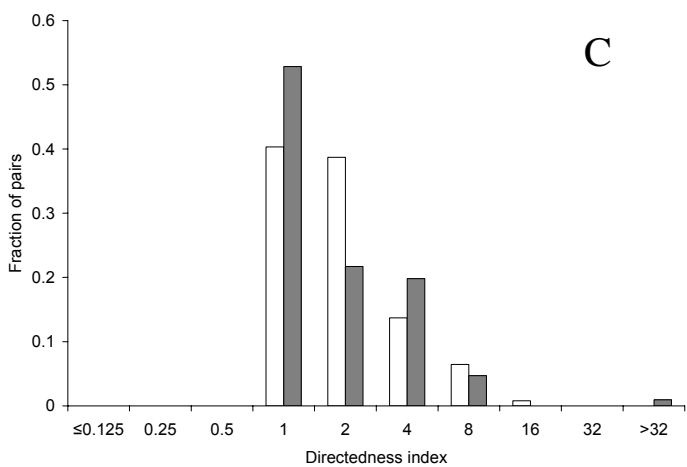

Supplement: pnas_0609484103_12.pdf [file pnas_0609484103_12.pdf]

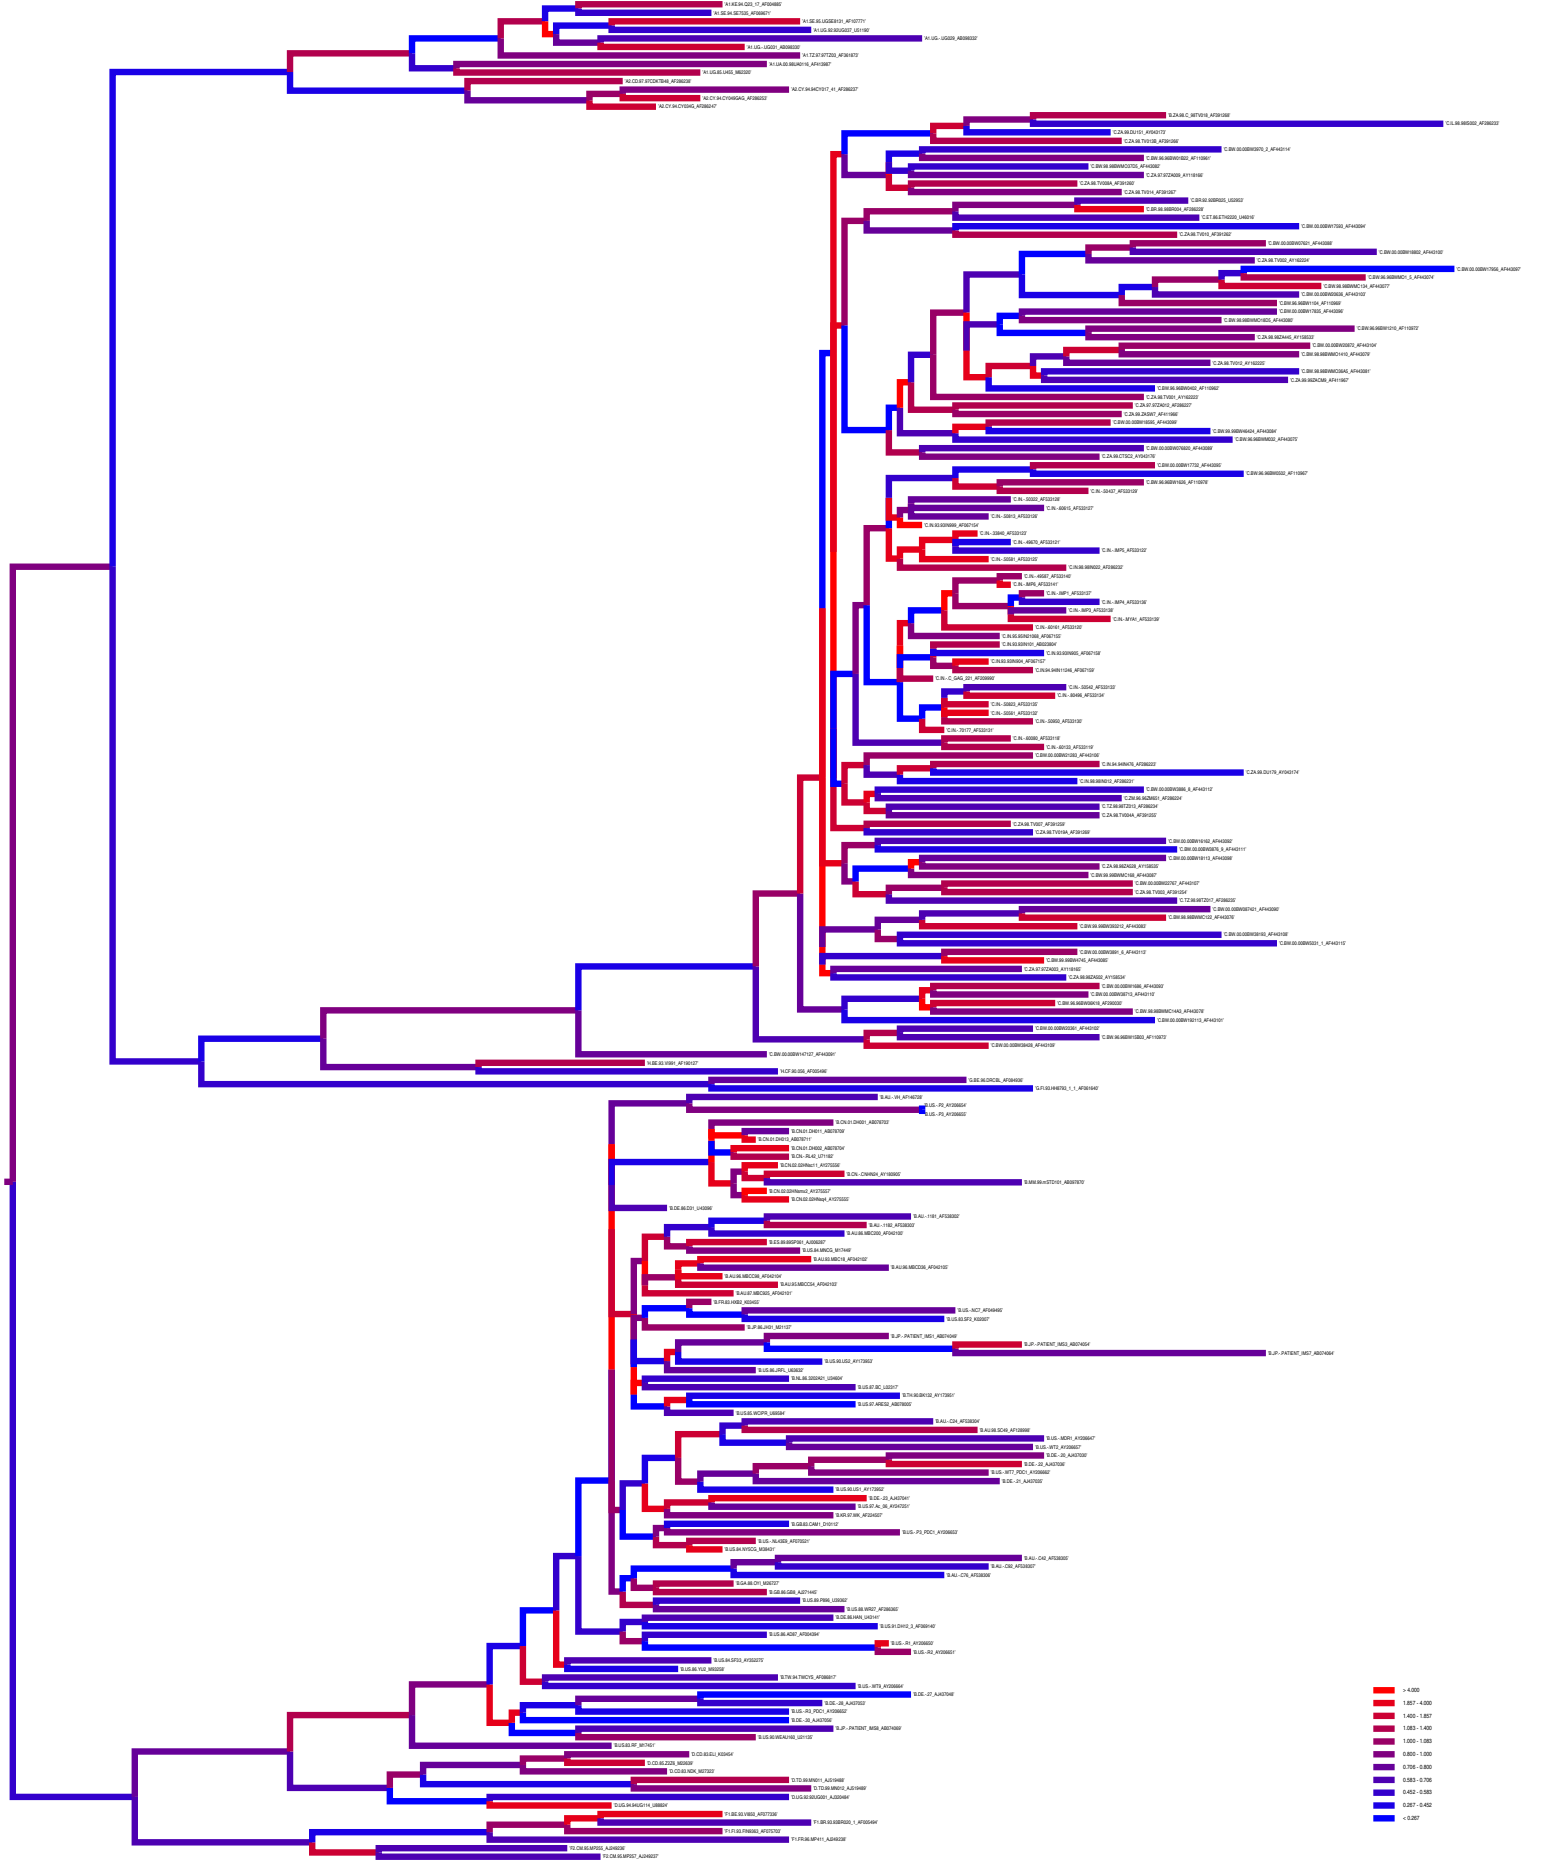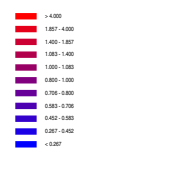

> 4.000  
3.857 - 4.000  
3.600 - 3.857  
3.400 - 3.600  
3.200 - 3.400  
3.000 - 3.200  
2.800 - 3.000  
2.600 - 2.800  
2.400 - 2.600  
2.200 - 2.400  
2.000 - 2.200  
1.800 - 2.000  
1.600 - 1.800  
1.400 - 1.600  
1.200 - 1.400  
1.000 - 1.200  
0.800 - 1.000  
0.700 - 0.800  
0.600 - 0.700  
0.500 - 0.600  
0.400 - 0.500  
0.300 - 0.400  
0.200 - 0.300  
<math>< 0.207</math>

Supplement: pnas_0609484103_2.pdf [file pnas_0609484103_2.pdf]

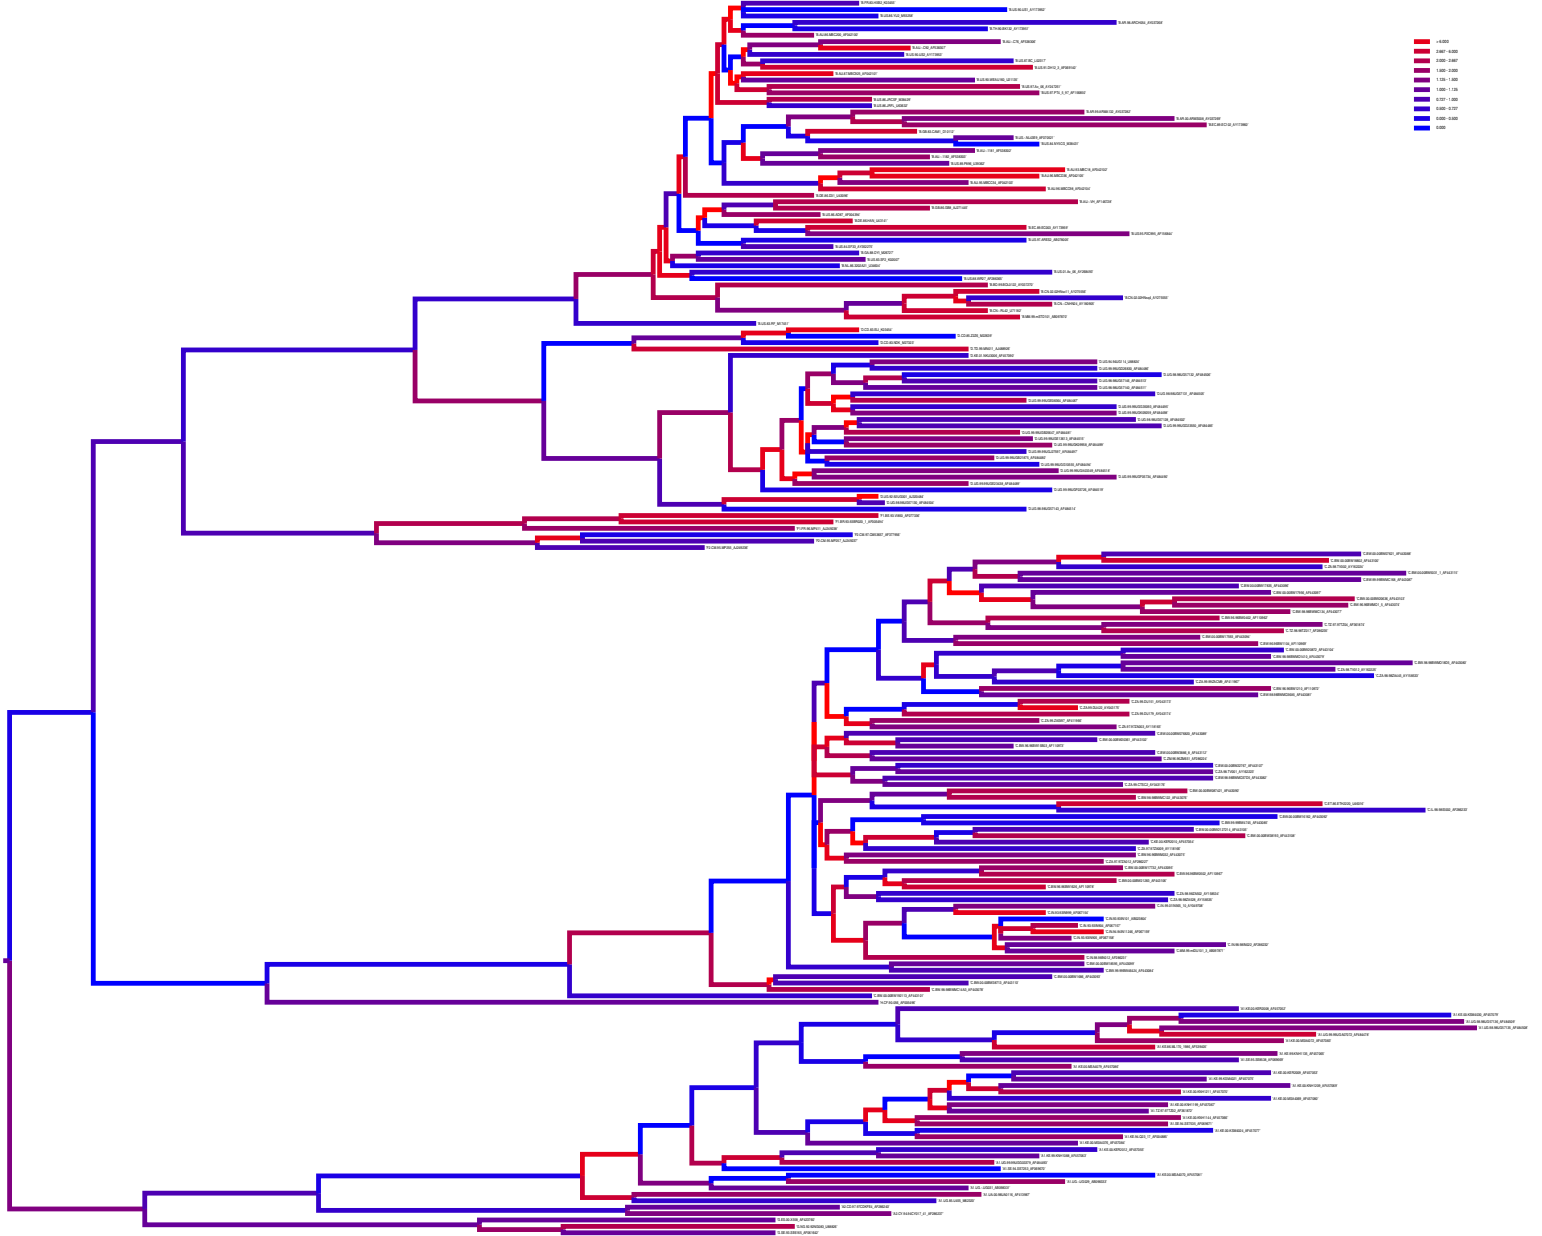

Supplement: pnas_0609484103_3.pdf [file pnas_0609484103_3.pdf]

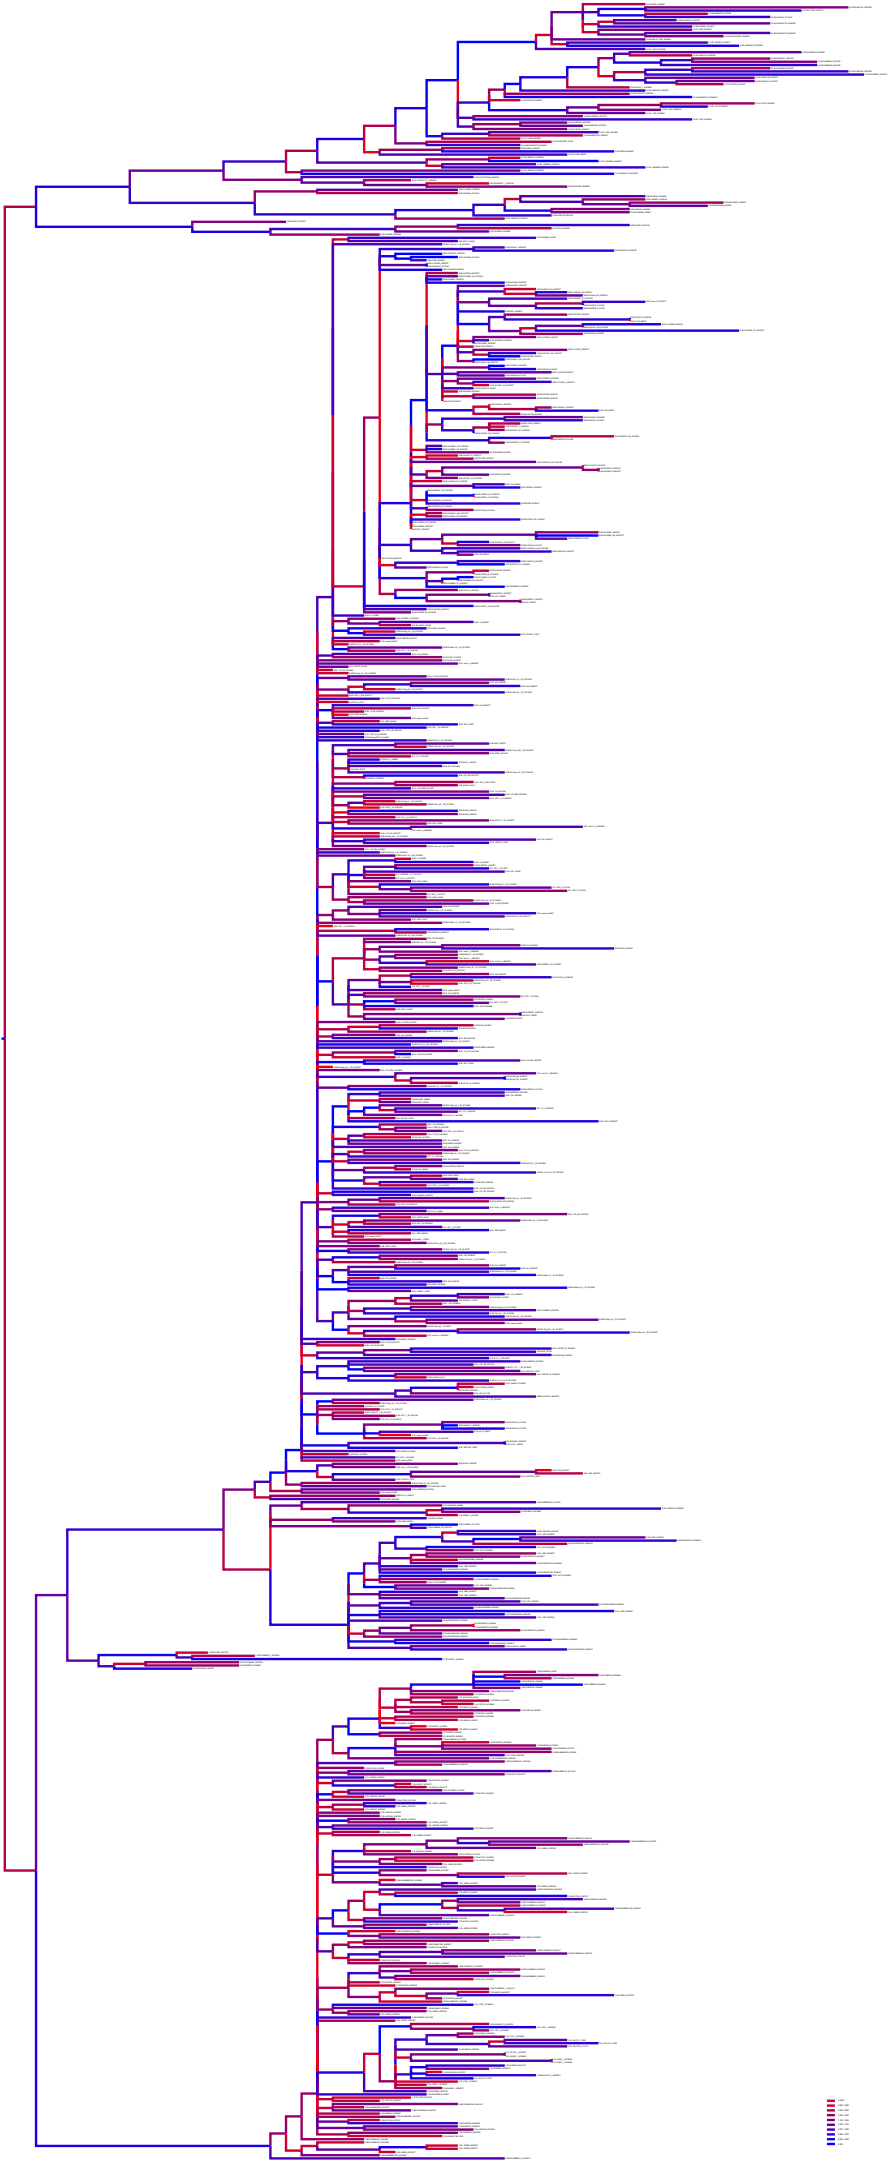

Supplement: pnas_0609484103_4.pdf [file pnas_0609484103_4.pdf]

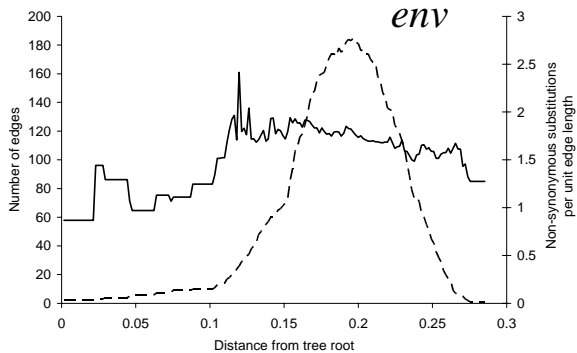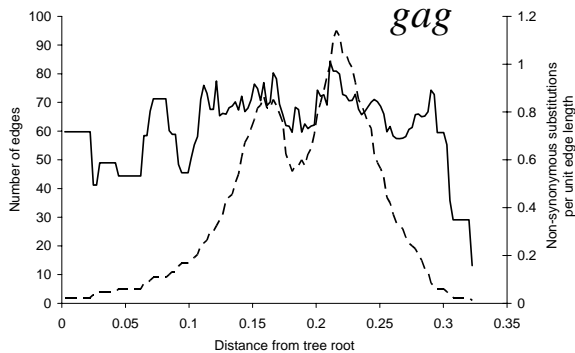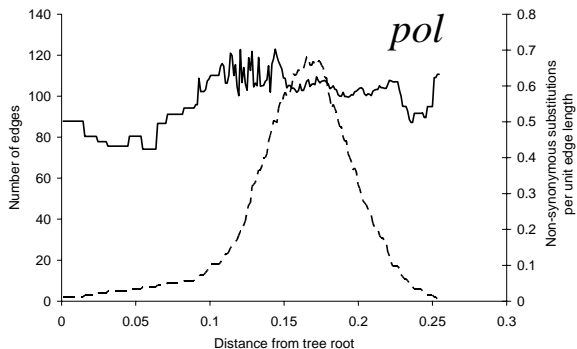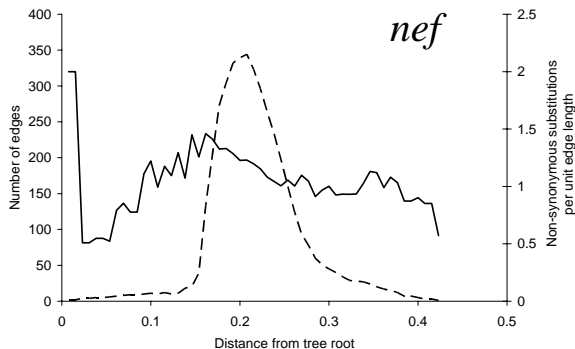

Supplement: pnas_0609484103_5.pdf [file pnas_0609484103_5.pdf]

# non-synonymous

# synonymous

*env*

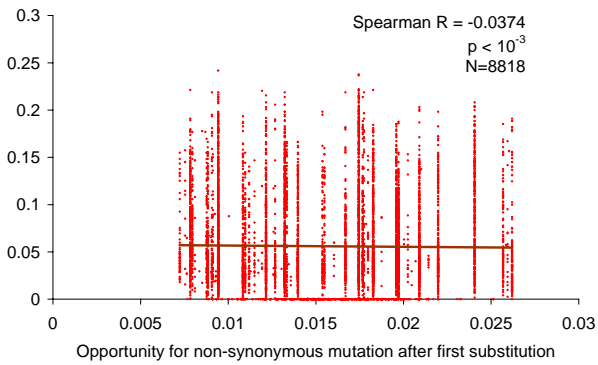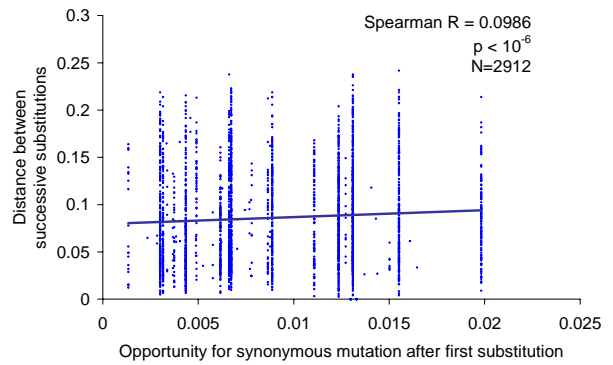

*gag*

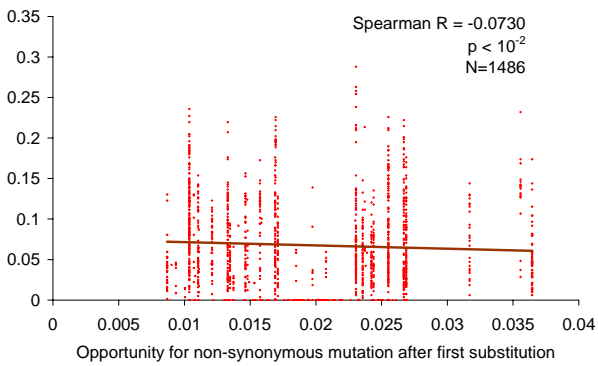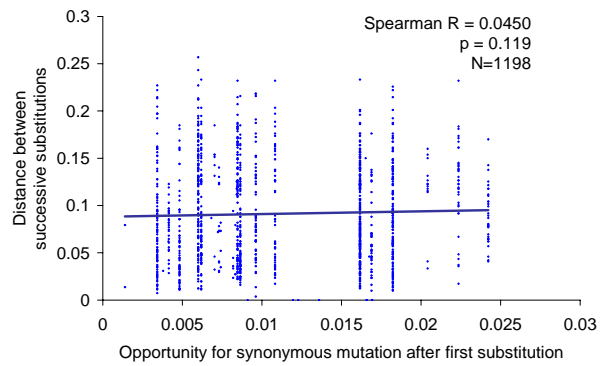

*pol*

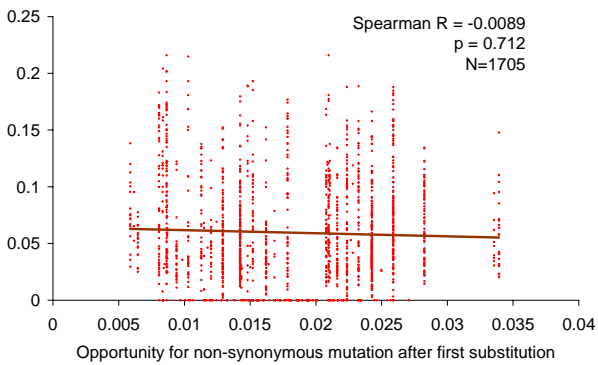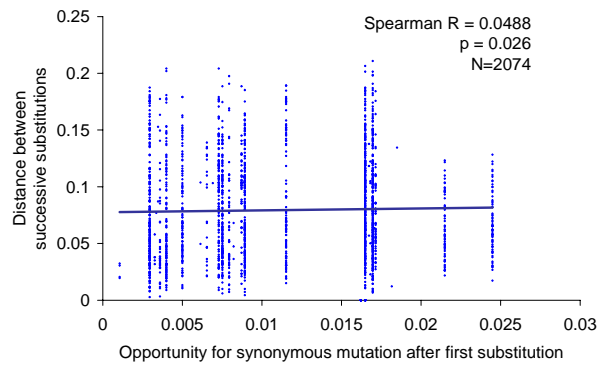

*nef*

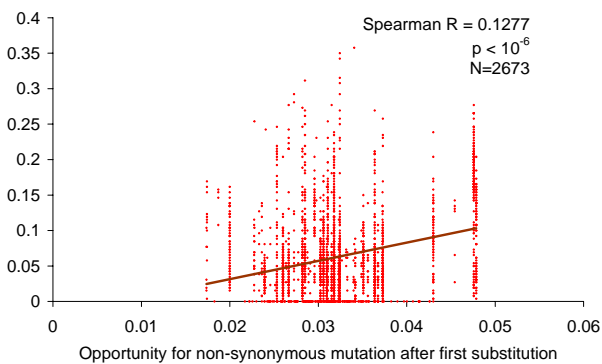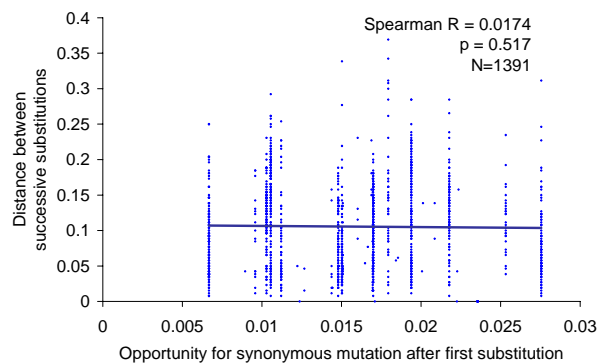

Supplement: pnas_0609484103_6.pdf [file pnas_0609484103_6.pdf]

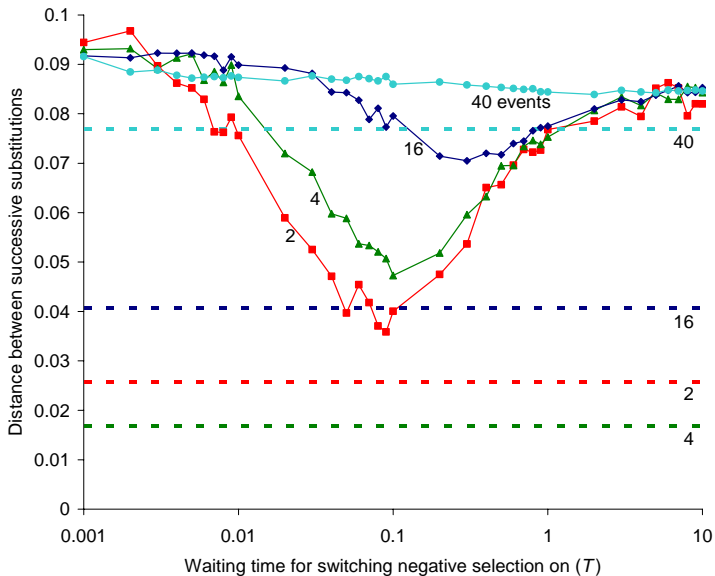

Supplement: pnas_0609484103_7.pdf [file pnas_0609484103_7.pdf]

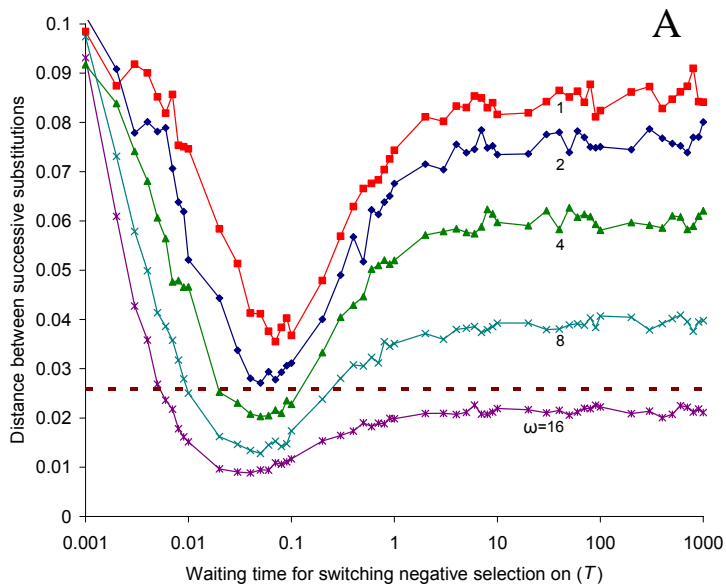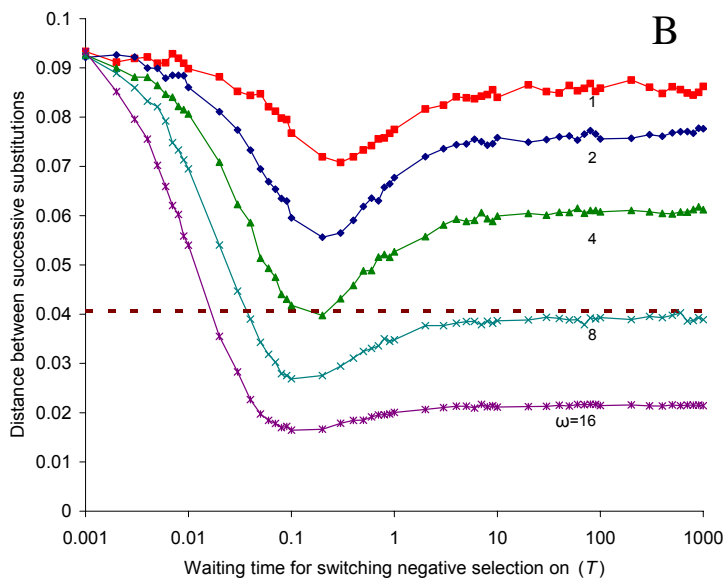

Supplement: pnas_0609484103_8.pdf [file pnas_0609484103_8.pdf]

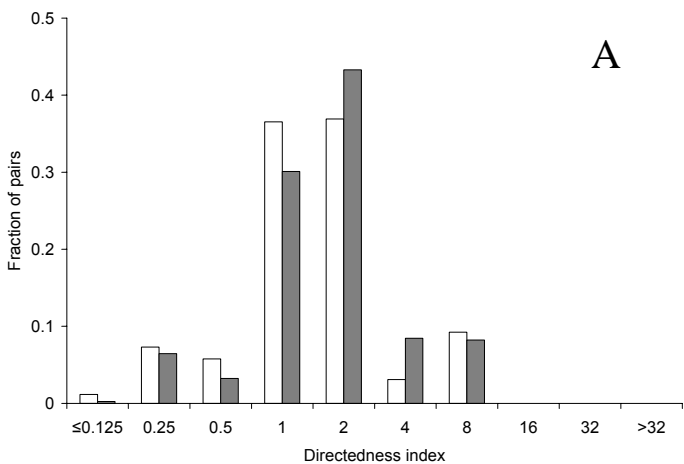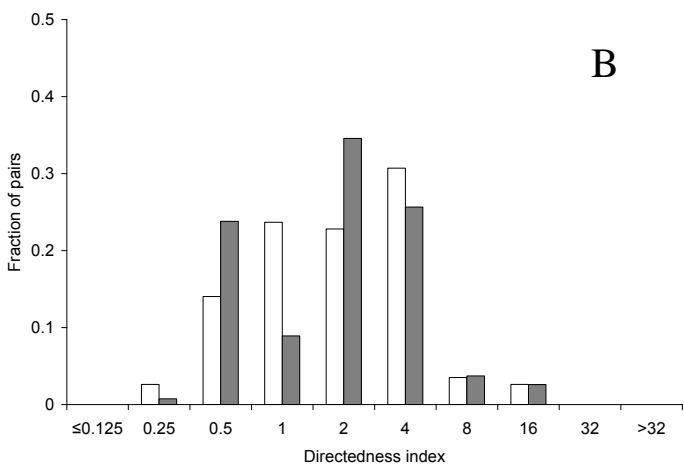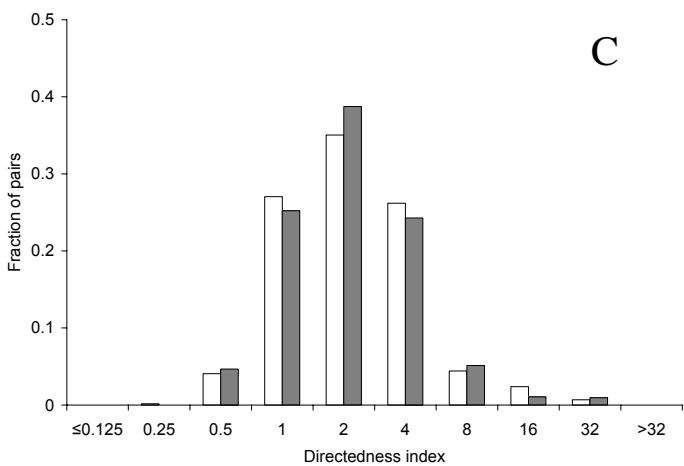

Supplement: pnas_0609484103_9.pdf [file pnas_0609484103_9.pdf]
